# Supplementary material for: Design of trials for interrupting the transmission of endemic pathogens
Source: Springer Nature journal article supplement (doi:10.1186/s13063-016-1378-1), 2016-06-06
Supplement: MOESM1 [file 10244956]

## Tables

Table S1: Power at rollout week 60 (simulation week 100) for the hierarchical design

| Simulated effectiveness: $\hat{e}_i = 30\%$ , significance level $\alpha = 0.1$ |                |             |             |             |             |             |             |
|---------------------------------------------------------------------------------|----------------|-------------|-------------|-------------|-------------|-------------|-------------|
| $r$                                                                             | $\bar{y}_r(0)$ | $\hat{e}_1$ | $\hat{e}_2$ | $\hat{e}_3$ | $\hat{e}_4$ | $\hat{e}_5$ | $\hat{e}_6$ |
| 0.50                                                                            | 0.10           | 1.00        | 0.94        | 1.00        | 0.98        | 0.89        | 0.52        |
| 0.50                                                                            | 0.20           | 1.00        | 0.93        | 1.00        | 0.99        | 0.90        | 0.52        |
| 0.50                                                                            | 0.50           | 0.99        | 0.80        | 1.00        | 0.97        | 0.83        | 0.40        |
| 0.50                                                                            | 0.80           | 0.95        | 0.41        | 0.99        | 0.84        | 0.58        | 0.18        |
| 1.00                                                                            | 0.10           | 1.00        | 0.99        | 1.00        | 0.80        | 0.80        | 0.66        |
| 1.00                                                                            | 0.20           | 1.00        | 0.98        | 1.00        | 0.84        | 0.73        | 0.58        |
| 1.00                                                                            | 0.50           | 0.99        | 0.95        | 1.00        | 0.79        | 0.63        | 0.45        |
| 1.00                                                                            | 0.80           | 0.91        | 0.66        | 0.99        | 0.50        | 0.44        | 0.29        |
| 1.50                                                                            | 0.10           | 1.00        | 0.99        | 1.00        | 0.54        | 0.94        | 0.88        |
| 1.50                                                                            | 0.20           | 0.99        | 0.99        | 1.00        | 0.54        | 0.79        | 0.74        |
| 1.50                                                                            | 0.50           | 0.98        | 0.97        | 1.00        | 0.45        | 0.56        | 0.48        |
| 1.50                                                                            | 0.80           | 0.88        | 0.78        | 0.99        | 0.25        | 0.41        | 0.36        |
| Simulated effectiveness: $\hat{e}_i = 80\%$ , $\alpha = 0.1$                    |                |             |             |             |             |             |             |
| $r$                                                                             | $\bar{y}_r(0)$ | $\hat{e}_1$ | $\hat{e}_2$ | $\hat{e}_3$ | $\hat{e}_4$ | $\hat{e}_5$ | $\hat{e}_6$ |
| 0.50                                                                            | 0.10           | 1.00        | 0.99        | 1.00        | 1.00        | 1.00        | 0.82        |
| 0.50                                                                            | 0.20           | 1.00        | 0.99        | 1.00        | 1.00        | 1.00        | 0.84        |
| 0.50                                                                            | 0.50           | 1.00        | 0.98        | 1.00        | 1.00        | 1.00        | 0.81        |
| 0.50                                                                            | 0.80           | 1.00        | 0.91        | 1.00        | 1.00        | 1.00        | 0.67        |
| 1.00                                                                            | 0.10           | 1.00        | 1.00        | 1.00        | 0.99        | 1.00        | 0.92        |
| 1.00                                                                            | 0.20           | 1.00        | 1.00        | 1.00        | 1.00        | 1.00        | 0.87        |
| 1.00                                                                            | 0.50           | 1.00        | 1.00        | 1.00        | 1.00        | 0.99        | 0.80        |
| 1.00                                                                            | 0.80           | 1.00        | 0.99        | 1.00        | 1.00        | 0.97        | 0.72        |
| 1.50                                                                            | 0.10           | 1.00        | 1.00        | 1.00        | 0.86        | 1.00        | 1.00        |
| 1.50                                                                            | 0.20           | 1.00        | 1.00        | 1.00        | 0.93        | 1.00        | 0.99        |
| 1.50                                                                            | 0.50           | 1.00        | 1.00        | 1.00        | 0.97        | 0.99        | 0.87        |
| 1.50                                                                            | 0.80           | 1.00        | 0.99        | 1.00        | 0.97        | 0.94        | 0.77        |

Table S2: Power at rollout week 60 (simulation week 100) for the oil drop design

| Simulated effectiveness: $\hat{e}_i = 30\%, \alpha = 0.1$ |                |             |             |             |             |             |             |
|-----------------------------------------------------------|----------------|-------------|-------------|-------------|-------------|-------------|-------------|
| $r$                                                       | $\bar{y}_r(0)$ | $\hat{e}_1$ | $\hat{e}_2$ | $\hat{e}_3$ | $\hat{e}_4$ | $\hat{e}_5$ | $\hat{e}_6$ |
| 0.50                                                      | 0.10           | 1.00        | 0.90        | 1.00        | 0.99        | 0.93        | 0.53        |
| 0.50                                                      | 0.20           | 1.00        | 0.89        | 1.00        | 0.99        | 0.94        | 0.54        |
| 0.50                                                      | 0.50           | 0.99        | 0.72        | 1.00        | 0.98        | 0.88        | 0.41        |
| 0.50                                                      | 0.80           | 0.95        | 0.37        | 1.00        | 0.86        | 0.64        | 0.18        |
| 1.00                                                      | 0.10           | 1.00        | 0.97        | 1.00        | 0.91        | 0.84        | 0.64        |
| 1.00                                                      | 0.20           | 1.00        | 0.97        | 1.00        | 0.93        | 0.82        | 0.59        |
| 1.00                                                      | 0.50           | 0.99        | 0.92        | 1.00        | 0.88        | 0.74        | 0.48        |
| 1.00                                                      | 0.80           | 0.93        | 0.60        | 0.99        | 0.60        | 0.52        | 0.28        |
| 1.50                                                      | 0.10           | 1.00        | 0.98        | 1.00        | 0.75        | 0.84        | 0.63        |
| 1.50                                                      | 0.20           | 1.00        | 0.98        | 1.00        | 0.77        | 0.82        | 0.61        |
| 1.50                                                      | 0.50           | 0.99        | 0.95        | 1.00        | 0.69        | 0.76        | 0.51        |
| 1.50                                                      | 0.80           | 0.91        | 0.71        | 0.99        | 0.41        | 0.52        | 0.31        |
| Simulated effectiveness: $\hat{e}_i = 80\%, \alpha = 0.1$ |                |             |             |             |             |             |             |
| $r$                                                       | $\bar{y}_r(0)$ | $\hat{e}_1$ | $\hat{e}_2$ | $\hat{e}_3$ | $\hat{e}_4$ | $\hat{e}_5$ | $\hat{e}_6$ |
| 0.50                                                      | 0.10           | 1.00        | 0.98        | 1.00        | 1.00        | 1.00        | 0.84        |
| 0.50                                                      | 0.20           | 1.00        | 0.98        | 1.00        | 1.00        | 1.00        | 0.87        |
| 0.50                                                      | 0.50           | 1.00        | 0.97        | 1.00        | 1.00        | 1.00        | 0.84        |
| 0.50                                                      | 0.80           | 1.00        | 0.86        | 1.00        | 1.00        | 1.00        | 0.68        |
| 1.00                                                      | 0.10           | 1.00        | 1.00        | 1.00        | 0.99        | 1.00        | 0.88        |
| 1.00                                                      | 0.20           | 1.00        | 1.00        | 1.00        | 1.00        | 1.00        | 0.87        |
| 1.00                                                      | 0.50           | 1.00        | 0.99        | 1.00        | 1.00        | 0.99        | 0.84        |
| 1.00                                                      | 0.80           | 1.00        | 0.97        | 1.00        | 1.00        | 0.99        | 0.75        |
| 1.50                                                      | 0.10           | 1.00        | 1.00        | 1.00        | 0.94        | 1.00        | 0.88        |
| 1.50                                                      | 0.20           | 1.00        | 1.00        | 1.00        | 0.97        | 1.00        | 0.88        |
| 1.50                                                      | 0.50           | 1.00        | 1.00        | 1.00        | 0.99        | 1.00        | 0.90        |
| 1.50                                                      | 0.80           | 1.00        | 0.99        | 1.00        | 0.98        | 0.99        | 0.82        |

Table S3: Power at rollout week 60 (simulation week 100) for the random design

| Simulated effectiveness: $\hat{e}_i = 30\%, \alpha = 0.1$ |                |             |             |             |             |             |             |
|-----------------------------------------------------------|----------------|-------------|-------------|-------------|-------------|-------------|-------------|
| $r$                                                       | $\bar{y}_r(0)$ | $\hat{e}_1$ | $\hat{e}_2$ | $\hat{e}_3$ | $\hat{e}_4$ | $\hat{e}_5$ | $\hat{e}_6$ |
| 0.50                                                      | 0.10           | 1.00        | 0.93        | 1.00        | 0.99        | 0.90        | 0.51        |
| 0.50                                                      | 0.20           | 1.00        | 0.93        | 1.00        | 0.99        | 0.90        | 0.52        |
| 0.50                                                      | 0.50           | 0.99        | 0.79        | 1.00        | 0.98        | 0.83        | 0.41        |
| 0.50                                                      | 0.80           | 0.95        | 0.41        | 1.00        | 0.85        | 0.59        | 0.18        |
| 1.00                                                      | 0.10           | 1.00        | 0.99        | 1.00        | 0.83        | 0.82        | 0.67        |
| 1.00                                                      | 0.20           | 1.00        | 0.98        | 1.00        | 0.87        | 0.74        | 0.56        |
| 1.00                                                      | 0.50           | 0.99        | 0.95        | 1.00        | 0.81        | 0.64        | 0.45        |
| 1.00                                                      | 0.80           | 0.92        | 0.66        | 0.99        | 0.53        | 0.45        | 0.29        |
| 1.50                                                      | 0.10           | 1.00        | 0.99        | 1.00        | 0.58        | 0.95        | 0.91        |
| 1.50                                                      | 0.20           | 1.00        | 0.99        | 1.00        | 0.59        | 0.86        | 0.78        |
| 1.50                                                      | 0.50           | 0.99        | 0.97        | 1.00        | 0.50        | 0.62        | 0.51        |
| 1.50                                                      | 0.80           | 0.90        | 0.78        | 0.99        | 0.28        | 0.45        | 0.37        |
| Simulated effectiveness: $\hat{e}_i = 80\%, \alpha = 0.1$ |                |             |             |             |             |             |             |
| $r$                                                       | $\bar{y}_r(0)$ | $\hat{e}_1$ | $\hat{e}_2$ | $\hat{e}_3$ | $\hat{e}_4$ | $\hat{e}_5$ | $\hat{e}_6$ |
| 0.50                                                      | 0.10           | 1.00        | 0.99        | 1.00        | 1.00        | 1.00        | 0.82        |
| 0.50                                                      | 0.20           | 1.00        | 0.99        | 1.00        | 1.00        | 1.00        | 0.84        |
| 0.50                                                      | 0.50           | 1.00        | 0.98        | 1.00        | 1.00        | 1.00        | 0.81        |
| 0.50                                                      | 0.80           | 1.00        | 0.91        | 1.00        | 1.00        | 1.00        | 0.67        |
| 1.00                                                      | 0.10           | 1.00        | 1.00        | 1.00        | 0.99        | 1.00        | 0.92        |
| 1.00                                                      | 0.20           | 1.00        | 1.00        | 1.00        | 1.00        | 1.00        | 0.87        |
| 1.00                                                      | 0.50           | 1.00        | 1.00        | 1.00        | 1.00        | 0.99        | 0.80        |
| 1.00                                                      | 0.80           | 1.00        | 0.99        | 1.00        | 1.00        | 0.97        | 0.72        |
| 1.50                                                      | 0.10           | 1.00        | 1.00        | 1.00        | 0.86        | 1.00        | 1.00        |
| 1.50                                                      | 0.20           | 1.00        | 1.00        | 1.00        | 0.93        | 1.00        | 0.99        |
| 1.50                                                      | 0.50           | 1.00        | 1.00        | 1.00        | 0.97        | 0.99        | 0.87        |
| 1.50                                                      | 0.80           | 1.00        | 0.99        | 1.00        | 0.97        | 0.94        | 0.77        |

Table S4: Median effectiveness measures and 95% confidence interval widths for the hierarchical design, summarized over 80 replicates and 10 geographies

| $r$ | $E_s$ | $\bar{y}_r(0)$ | $\hat{e}_1$ | $\hat{e}_2$ | $\hat{e}_3$ | $\hat{e}_1$ | 95% CI width | $\hat{e}_2$ | 95% CI width | $\hat{e}_3$ | 95% CI width | $\hat{e}_4$ | $\hat{e}_5$ | $\hat{e}_6$ | $\hat{e}_4$ | CI width | $\hat{e}_5$ | CI width | $\hat{e}_6$ | CI width |
|-----|-------|----------------|-------------|-------------|-------------|-------------|--------------|-------------|--------------|-------------|--------------|-------------|-------------|-------------|-------------|----------|-------------|----------|-------------|----------|
| 0.5 | 0.3   | 0.1            | 0.35        | 0.08        | 0.14        | 0.31        | 0.23         | 0.20        | 0.30         | 0.32        | 0.12         | 0.36        | 0.38        | 0.43        |             |          |             |          |             |          |
| 0.5 | 0.3   | 0.2            | 0.33        | 0.06        | 0.13        | 0.21        | 0.15         | 0.13        | 0.28         | 0.31        | 0.11         | 0.24        | 0.25        | 0.28        |             |          |             |          |             |          |
| 0.5 | 0.3   | 0.5            | 0.25        | 0.03        | 0.09        | 0.12        | 0.07         | 0.07        | 0.22         | 0.24        | 0.08         | 0.13        | 0.13        | 0.14        |             |          |             |          |             |          |
| 0.5 | 0.3   | 0.8            | 0.15        | 0.02        | 0.05        | 0.07        | 0.03         | 0.04        | 0.13         | 0.15        | 0.04         | 0.07        | 0.07        | 0.07        |             |          |             |          |             |          |
| 0.5 | 0.8   | 0.1            | 0.74        | 0.14        | 0.28        | 0.20        | 0.23         | 0.21        | 0.70         | 0.72        | 0.29         | 0.23        | 0.22        | 0.37        |             |          |             |          |             |          |
| 0.5 | 0.8   | 0.2            | 0.72        | 0.12        | 0.27        | 0.15        | 0.15         | 0.15        | 0.68         | 0.71        | 0.28         | 0.17        | 0.16        | 0.26        |             |          |             |          |             |          |
| 0.5 | 0.8   | 0.5            | 0.66        | 0.08        | 0.23        | 0.12        | 0.08         | 0.11        | 0.63         | 0.66        | 0.22         | 0.13        | 0.12        | 0.14        |             |          |             |          |             |          |
| 0.5 | 0.8   | 0.8            | 0.55        | 0.05        | 0.17        | 0.11        | 0.04         | 0.09        | 0.53         | 0.55        | 0.14         | 0.11        | 0.11        | 0.08        |             |          |             |          |             |          |
| 1.0 | 0.3   | 0.1            | 0.23        | 0.09        | 0.12        | 0.32        | 0.23         | 0.21        | 0.16         | 0.21        | 0.10         | 0.37        | 0.46        | 0.44        |             |          |             |          |             |          |
| 1.0 | 0.3   | 0.2            | 0.21        | 0.08        | 0.11        | 0.22        | 0.15         | 0.13        | 0.14         | 0.20        | 0.09         | 0.25        | 0.31        | 0.29        |             |          |             |          |             |          |
| 1.0 | 0.3   | 0.5            | 0.16        | 0.05        | 0.08        | 0.12        | 0.07         | 0.07        | 0.11         | 0.16        | 0.07         | 0.14        | 0.16        | 0.14        |             |          |             |          |             |          |
| 1.0 | 0.3   | 0.8            | 0.09        | 0.03        | 0.04        | 0.07        | 0.03         | 0.03        | 0.06         | 0.09        | 0.04         | 0.07        | 0.09        | 0.07        |             |          |             |          |             |          |
| 1.0 | 0.8   | 0.1            | 0.54        | 0.21        | 0.29        | 0.26        | 0.23         | 0.21        | 0.42         | 0.52        | 0.25         | 0.35        | 0.34        | 0.39        |             |          |             |          |             |          |
| 1.0 | 0.8   | 0.2            | 0.52        | 0.19        | 0.27        | 0.20        | 0.16         | 0.16        | 0.40         | 0.50        | 0.23         | 0.26        | 0.25        | 0.26        |             |          |             |          |             |          |
| 1.0 | 0.8   | 0.5            | 0.44        | 0.15        | 0.22        | 0.15        | 0.10         | 0.12        | 0.34         | 0.43        | 0.19         | 0.18        | 0.17        | 0.14        |             |          |             |          |             |          |
| 1.0 | 0.8   | 0.8            | 0.31        | 0.09        | 0.14        | 0.12        | 0.06         | 0.08        | 0.24         | 0.31        | 0.11         | 0.13        | 0.13        | 0.08        |             |          |             |          |             |          |
| 1.5 | 0.3   | 0.1            | 0.17        | 0.10        | 0.12        | 0.33        | 0.23         | 0.21        | 0.07         | 0.15        | 0.09         | 0.39        | 0.78        | 0.77        |             |          |             |          |             |          |
| 1.5 | 0.3   | 0.2            | 0.16        | 0.09        | 0.11        | 0.22        | 0.15         | 0.14        | 0.07         | 0.14        | 0.09         | 0.26        | 0.51        | 0.50        |             |          |             |          |             |          |
| 1.5 | 0.3   | 0.5            | 0.12        | 0.07        | 0.08        | 0.12        | 0.07         | 0.07        | 0.05         | 0.11        | 0.07         | 0.14        | 0.25        | 0.24        |             |          |             |          |             |          |
| 1.5 | 0.3   | 0.8            | 0.06        | 0.03        | 0.04        | 0.06        | 0.04         | 0.03        | 0.03         | 0.06        | 0.04         | 0.07        | 0.13        | 0.12        |             |          |             |          |             |          |
| 1.5 | 0.8   | 0.1            | 0.41        | 0.25        | 0.29        | 0.30        | 0.23         | 0.22        | 0.22         | 0.39        | 0.24         | 0.42        | 0.61        | 0.66        |             |          |             |          |             |          |
| 1.5 | 0.8   | 0.2            | 0.40        | 0.24        | 0.28        | 0.23        | 0.17         | 0.17        | 0.20         | 0.37        | 0.23         | 0.30        | 0.42        | 0.44        |             |          |             |          |             |          |
| 1.5 | 0.8   | 0.5            | 0.32        | 0.18        | 0.22        | 0.16        | 0.11         | 0.12        | 0.17         | 0.31        | 0.18         | 0.19        | 0.25        | 0.23        |             |          |             |          |             |          |
| 1.5 | 0.8   | 0.8            | 0.20        | 0.11        | 0.13        | 0.12        | 0.07         | 0.08        | 0.11         | 0.20        | 0.11         | 0.12        | 0.16        | 0.13        |             |          |             |          |             |          |

Table S5: Bias defined as the difference between median estimates and median  $\hat{e}_1$ , hierarchical design, summarized over 80 replicates and 10 geographies

| $r$ | $E_s$ | $\bar{y}_r(0)$ | Bias $\hat{e}_2$ | Bias $\hat{e}_3$ | Bias $\hat{e}_4$ | Bias $\hat{e}_5$ | Bias $\hat{e}_6$ |
|-----|-------|----------------|------------------|------------------|------------------|------------------|------------------|
| 0.5 | 0.3   | 0.1            | 0.28             | 0.21             | 0.05             | 0.03             | 0.24             |
| 0.5 | 0.3   | 0.2            | 0.26             | 0.20             | 0.05             | 0.02             | 0.22             |
| 0.5 | 0.3   | 0.5            | 0.22             | 0.16             | 0.03             | 0.01             | 0.17             |
| 0.5 | 0.3   | 0.8            | 0.13             | 0.10             | 0.01             | 0.00             | 0.10             |
| 0.5 | 0.8   | 0.1            | 0.60             | 0.45             | 0.04             | 0.01             | 0.45             |
| 0.5 | 0.8   | 0.2            | 0.60             | 0.45             | 0.04             | 0.01             | 0.45             |
| 0.5 | 0.8   | 0.5            | 0.58             | 0.44             | 0.03             | 0.01             | 0.44             |
| 0.5 | 0.8   | 0.8            | 0.50             | 0.38             | 0.02             | 0.00             | 0.41             |
| 1.0 | 0.3   | 0.1            | 0.14             | 0.11             | 0.08             | 0.02             | 0.14             |
| 1.0 | 0.3   | 0.2            | 0.13             | 0.10             | 0.07             | 0.01             | 0.12             |
| 1.0 | 0.3   | 0.5            | 0.11             | 0.08             | 0.05             | 0.01             | 0.09             |
| 1.0 | 0.3   | 0.8            | 0.06             | 0.05             | 0.03             | 0.00             | 0.05             |
| 1.0 | 0.8   | 0.1            | 0.33             | 0.25             | 0.12             | 0.02             | 0.29             |
| 1.0 | 0.8   | 0.2            | 0.32             | 0.24             | 0.12             | 0.02             | 0.28             |
| 1.0 | 0.8   | 0.5            | 0.29             | 0.22             | 0.10             | 0.01             | 0.26             |
| 1.0 | 0.8   | 0.8            | 0.22             | 0.17             | 0.07             | 0.00             | 0.20             |
| 1.5 | 0.3   | 0.1            | 0.07             | 0.05             | 0.10             | 0.02             | 0.08             |
| 1.5 | 0.3   | 0.2            | 0.06             | 0.05             | 0.09             | 0.02             | 0.07             |
| 1.5 | 0.3   | 0.5            | 0.05             | 0.04             | 0.06             | 0.01             | 0.05             |
| 1.5 | 0.3   | 0.8            | 0.03             | 0.02             | 0.03             | 0.00             | 0.03             |
| 1.5 | 0.8   | 0.1            | 0.16             | 0.12             | 0.20             | 0.03             | 0.17             |
| 1.5 | 0.8   | 0.2            | 0.16             | 0.12             | 0.19             | 0.03             | 0.17             |
| 1.5 | 0.8   | 0.5            | 0.14             | 0.10             | 0.15             | 0.01             | 0.13             |
| 1.5 | 0.8   | 0.8            | 0.09             | 0.07             | 0.10             | 0.00             | 0.09             |

Table S6: Median effectiveness measures and 95% confidence interval widths for the oil drop design, summarized over 80 replicates and 10 geographies

| $r$ | $E_s$ | $\bar{y}_r(0)$ | Prevalence | $\hat{e}_1$ | $\hat{e}_2$ | $\hat{e}_3$ | $\hat{e}_1$ CI width | $\hat{e}_2$ CI width | $\hat{e}_3$ CI width | $\hat{e}_4$ | $\hat{e}_5$ | $\hat{e}_6$ | $\hat{e}_4$ CI width | $\hat{e}_5$ CI width | $\hat{e}_6$ CI width |
|-----|-------|----------------|------------|-------------|-------------|-------------|----------------------|----------------------|----------------------|-------------|-------------|-------------|----------------------|----------------------|----------------------|
| 0.5 | 0.3   | 0.1            | 0.36       | 0.07        | 0.14        | 0.31        | 0.20                 | 0.23                 | 0.31                 | 0.34        | 0.12        | 0.36        | 0.37                 | 0.37                 | 0.44                 |
| 0.5 | 0.3   | 0.2            | 0.34       | 0.06        | 0.13        | 0.30        | 0.13                 | 0.15                 | 0.30                 | 0.32        | 0.11        | 0.25        | 0.25                 | 0.25                 | 0.29                 |
| 0.5 | 0.3   | 0.5            | 0.26       | 0.03        | 0.09        | 0.24        | 0.06                 | 0.07                 | 0.24                 | 0.25        | 0.08        | 0.14        | 0.13                 | 0.13                 | 0.14                 |
| 0.5 | 0.3   | 0.8            | 0.15       | 0.01        | 0.05        | 0.14        | 0.03                 | 0.03                 | 0.14                 | 0.15        | 0.04        | 0.08        | 0.08                 | 0.08                 | 0.07                 |
| 0.5 | 0.8   | 0.1            | 0.76       | 0.12        | 0.28        | 0.72        | 0.19                 | 0.23                 | 0.72                 | 0.74        | 0.29        | 0.23        | 0.21                 | 0.21                 | 0.39                 |
| 0.5 | 0.8   | 0.2            | 0.74       | 0.11        | 0.27        | 0.71        | 0.13                 | 0.15                 | 0.71                 | 0.73        | 0.28        | 0.18        | 0.17                 | 0.17                 | 0.27                 |
| 0.5 | 0.8   | 0.5            | 0.68       | 0.08        | 0.23        | 0.66        | 0.08                 | 0.08                 | 0.66                 | 0.68        | 0.23        | 0.14        | 0.13                 | 0.13                 | 0.15                 |
| 0.5 | 0.8   | 0.8            | 0.57       | 0.04        | 0.17        | 0.55        | 0.05                 | 0.04                 | 0.55                 | 0.57        | 0.14        | 0.14        | 0.13                 | 0.13                 | 0.09                 |
| 1.0 | 0.3   | 0.1            | 0.25       | 0.08        | 0.12        | 0.19        | 0.20                 | 0.24                 | 0.19                 | 0.24        | 0.10        | 0.39        | 0.45                 | 0.45                 | 0.41                 |
| 1.0 | 0.3   | 0.2            | 0.24       | 0.07        | 0.11        | 0.18        | 0.13                 | 0.15                 | 0.18                 | 0.23        | 0.09        | 0.27        | 0.29                 | 0.29                 | 0.27                 |
| 1.0 | 0.3   | 0.5            | 0.18       | 0.05        | 0.08        | 0.14        | 0.06                 | 0.07                 | 0.14                 | 0.18        | 0.07        | 0.15        | 0.16                 | 0.16                 | 0.13                 |
| 1.0 | 0.3   | 0.8            | 0.10       | 0.03        | 0.04        | 0.08        | 0.03                 | 0.03                 | 0.08                 | 0.10        | 0.04        | 0.09        | 0.09                 | 0.09                 | 0.07                 |
| 1.0 | 0.8   | 0.1            | 0.58       | 0.19        | 0.28        | 0.49        | 0.19                 | 0.23                 | 0.49                 | 0.57        | 0.26        | 0.38        | 0.33                 | 0.33                 | 0.37                 |
| 1.0 | 0.8   | 0.2            | 0.56       | 0.17        | 0.27        | 0.47        | 0.13                 | 0.16                 | 0.47                 | 0.55        | 0.25        | 0.31        | 0.26                 | 0.26                 | 0.26                 |
| 1.0 | 0.8   | 0.5            | 0.49       | 0.13        | 0.22        | 0.40        | 0.08                 | 0.09                 | 0.40                 | 0.48        | 0.20        | 0.26        | 0.22                 | 0.22                 | 0.14                 |
| 1.0 | 0.8   | 0.8            | 0.35       | 0.08        | 0.15        | 0.29        | 0.05                 | 0.05                 | 0.29                 | 0.35        | 0.12        | 0.23        | 0.20                 | 0.20                 | 0.08                 |
| 1.5 | 0.3   | 0.1            | 0.20       | 0.09        | 0.12        | 0.12        | 0.20                 | 0.22                 | 0.12                 | 0.19        | 0.09        | 0.40        | 0.58                 | 0.58                 | 0.54                 |
| 1.5 | 0.3   | 0.2            | 0.18       | 0.09        | 0.11        | 0.11        | 0.13                 | 0.14                 | 0.11                 | 0.18        | 0.09        | 0.28        | 0.39                 | 0.39                 | 0.36                 |
| 1.5 | 0.3   | 0.5            | 0.14       | 0.06        | 0.08        | 0.08        | 0.06                 | 0.07                 | 0.08                 | 0.14        | 0.07        | 0.16        | 0.20                 | 0.20                 | 0.17                 |
| 1.5 | 0.3   | 0.8            | 0.08       | 0.03        | 0.04        | 0.04        | 0.03                 | 0.03                 | 0.04                 | 0.08        | 0.04        | 0.09        | 0.11                 | 0.11                 | 0.09                 |
| 1.5 | 0.8   | 0.1            | 0.47       | 0.23        | 0.29        | 0.32        | 0.19                 | 0.23                 | 0.32                 | 0.47        | 0.26        | 0.47        | 0.48                 | 0.48                 | 0.47                 |
| 1.5 | 0.8   | 0.2            | 0.45       | 0.22        | 0.27        | 0.30        | 0.13                 | 0.17                 | 0.30                 | 0.44        | 0.25        | 0.39        | 0.36                 | 0.36                 | 0.33                 |
| 1.5 | 0.8   | 0.5            | 0.37       | 0.17        | 0.22        | 0.24        | 0.08                 | 0.10                 | 0.24                 | 0.37        | 0.20        | 0.32        | 0.26                 | 0.26                 | 0.18                 |
| 1.5 | 0.8   | 0.8            | 0.25       | 0.10        | 0.14        | 0.16        | 0.05                 | 0.06                 | 0.16                 | 0.24        | 0.12        | 0.25        | 0.22                 | 0.22                 | 0.10                 |

Table S7: Bias defined as the difference between median effectiveness estimates and median  $\hat{e}_1$ , oil drop design, summarized over 80 replicates and 10 geographies

| $r$ | $E_s$ | $\bar{y}_r(0)$ | Bias $\hat{e}_2$ | Bias $\hat{e}_3$ | Bias $\hat{e}_4$ | Bias $\hat{e}_5$ | Bias $\hat{e}_6$ |
|-----|-------|----------------|------------------|------------------|------------------|------------------|------------------|
| 0.5 | 0.3   | 0.1            | 0.29             | 0.22             | 0.05             | 0.03             | 0.25             |
| 0.5 | 0.3   | 0.2            | 0.28             | 0.21             | 0.04             | 0.02             | 0.23             |
| 0.5 | 0.3   | 0.5            | 0.23             | 0.17             | 0.02             | 0.01             | 0.18             |
| 0.5 | 0.3   | 0.8            | 0.14             | 0.10             | 0.01             | 0.00             | 0.11             |
| 0.5 | 0.8   | 0.1            | 0.63             | 0.47             | 0.04             | 0.01             | 0.46             |
| 0.5 | 0.8   | 0.2            | 0.63             | 0.48             | 0.03             | 0.01             | 0.46             |
| 0.5 | 0.8   | 0.5            | 0.61             | 0.46             | 0.03             | 0.00             | 0.46             |
| 0.5 | 0.8   | 0.8            | 0.53             | 0.40             | 0.02             | 0.00             | 0.43             |
| 1.0 | 0.3   | 0.1            | 0.17             | 0.13             | 0.07             | 0.01             | 0.15             |
| 1.0 | 0.3   | 0.2            | 0.16             | 0.12             | 0.06             | 0.01             | 0.14             |
| 1.0 | 0.3   | 0.5            | 0.13             | 0.10             | 0.04             | 0.00             | 0.11             |
| 1.0 | 0.3   | 0.8            | 0.08             | 0.06             | 0.02             | 0.00             | 0.06             |
| 1.0 | 0.8   | 0.1            | 0.40             | 0.30             | 0.10             | 0.01             | 0.32             |
| 1.0 | 0.8   | 0.2            | 0.39             | 0.29             | 0.09             | 0.01             | 0.31             |
| 1.0 | 0.8   | 0.5            | 0.35             | 0.26             | 0.08             | 0.01             | 0.29             |
| 1.0 | 0.8   | 0.8            | 0.27             | 0.20             | 0.06             | 0.00             | 0.23             |
| 1.5 | 0.3   | 0.1            | 0.11             | 0.08             | 0.08             | 0.01             | 0.11             |
| 1.5 | 0.3   | 0.2            | 0.10             | 0.07             | 0.08             | 0.01             | 0.09             |
| 1.5 | 0.3   | 0.5            | 0.08             | 0.06             | 0.06             | 0.00             | 0.07             |
| 1.5 | 0.3   | 0.8            | 0.04             | 0.03             | 0.03             | 0.00             | 0.04             |
| 1.5 | 0.8   | 0.1            | 0.24             | 0.18             | 0.16             | 0.01             | 0.21             |
| 1.5 | 0.8   | 0.2            | 0.24             | 0.18             | 0.15             | 0.01             | 0.21             |
| 1.5 | 0.8   | 0.5            | 0.21             | 0.15             | 0.13             | 0.00             | 0.18             |
| 1.5 | 0.8   | 0.8            | 0.15             | 0.11             | 0.09             | 0.00             | 0.13             |

Table S8: Median effectiveness measures and 95% confidence interval widths for the random design, summarized over 80 replicates and 10 geographies

| $r$ | $E_s$ | $\bar{y}_r(0)$ | $\hat{e}_1$ | $\hat{e}_2$ | $\hat{e}_3$ | $\hat{e}_1$ CI width | $\hat{e}_2$ CI width | $\hat{e}_3$ CI width | $\hat{e}_4$ | $\hat{e}_5$ | $\hat{e}_6$ | $\hat{e}_4$ CI width | $\hat{e}_5$ CI width | $\hat{e}_6$ CI width |
|-----|-------|----------------|-------------|-------------|-------------|----------------------|----------------------|----------------------|-------------|-------------|-------------|----------------------|----------------------|----------------------|
| 0.5 | 0.3   | 0.1            | 0.35        | 0.08        | 0.14        | 0.30                 | 0.23                 | 0.20                 | 0.30        | 0.32        | 0.12        | 0.36                 | 0.37                 | 0.43                 |
| 0.5 | 0.3   | 0.2            | 0.33        | 0.06        | 0.13        | 0.21                 | 0.15                 | 0.13                 | 0.28        | 0.31        | 0.11        | 0.25                 | 0.25                 | 0.27                 |
| 0.5 | 0.3   | 0.5            | 0.25        | 0.04        | 0.09        | 0.11                 | 0.07                 | 0.06                 | 0.22        | 0.24        | 0.08        | 0.13                 | 0.13                 | 0.14                 |
| 0.5 | 0.3   | 0.8            | 0.15        | 0.02        | 0.05        | 0.07                 | 0.03                 | 0.03                 | 0.13        | 0.15        | 0.04        | 0.07                 | 0.07                 | 0.07                 |
| 0.5 | 0.8   | 0.1            | 0.74        | 0.14        | 0.28        | 0.19                 | 0.23                 | 0.19                 | 0.70        | 0.73        | 0.29        | 0.23                 | 0.21                 | 0.37                 |
| 0.5 | 0.8   | 0.2            | 0.72        | 0.12        | 0.27        | 0.15                 | 0.15                 | 0.13                 | 0.69        | 0.71        | 0.27        | 0.17                 | 0.16                 | 0.25                 |
| 0.5 | 0.8   | 0.5            | 0.66        | 0.08        | 0.23        | 0.11                 | 0.07                 | 0.07                 | 0.63        | 0.66        | 0.22        | 0.13                 | 0.12                 | 0.14                 |
| 0.5 | 0.8   | 0.8            | 0.55        | 0.05        | 0.17        | 0.11                 | 0.04                 | 0.05                 | 0.53        | 0.55        | 0.14        | 0.12                 | 0.11                 | 0.08                 |
| 1.0 | 0.3   | 0.1            | 0.24        | 0.09        | 0.12        | 0.32                 | 0.23                 | 0.20                 | 0.16        | 0.22        | 0.10        | 0.37                 | 0.46                 | 0.44                 |
| 1.0 | 0.3   | 0.2            | 0.22        | 0.08        | 0.11        | 0.22                 | 0.14                 | 0.13                 | 0.15        | 0.20        | 0.09        | 0.26                 | 0.31                 | 0.28                 |
| 1.0 | 0.3   | 0.5            | 0.16        | 0.06        | 0.08        | 0.12                 | 0.07                 | 0.06                 | 0.11        | 0.16        | 0.07        | 0.14                 | 0.16                 | 0.14                 |
| 1.0 | 0.3   | 0.8            | 0.09        | 0.03        | 0.04        | 0.07                 | 0.03                 | 0.03                 | 0.07        | 0.09        | 0.04        | 0.08                 | 0.09                 | 0.07                 |
| 1.0 | 0.8   | 0.1            | 0.54        | 0.21        | 0.29        | 0.26                 | 0.22                 | 0.18                 | 0.42        | 0.53        | 0.25        | 0.36                 | 0.34                 | 0.38                 |
| 1.0 | 0.8   | 0.2            | 0.52        | 0.19        | 0.28        | 0.20                 | 0.15                 | 0.13                 | 0.41        | 0.51        | 0.23        | 0.28                 | 0.25                 | 0.26                 |
| 1.0 | 0.8   | 0.5            | 0.45        | 0.15        | 0.22        | 0.16                 | 0.08                 | 0.08                 | 0.35        | 0.44        | 0.19        | 0.20                 | 0.18                 | 0.14                 |
| 1.0 | 0.8   | 0.8            | 0.31        | 0.09        | 0.14        | 0.14                 | 0.04                 | 0.05                 | 0.25        | 0.31        | 0.11        | 0.16                 | 0.15                 | 0.08                 |
| 1.5 | 0.3   | 0.1            | 0.18        | 0.10        | 0.12        | 0.32                 | 0.22                 | 0.20                 | 0.08        | 0.15        | 0.09        | 0.38                 | 0.76                 | 0.76                 |
| 1.5 | 0.3   | 0.2            | 0.16        | 0.10        | 0.11        | 0.22                 | 0.14                 | 0.13                 | 0.07        | 0.15        | 0.09        | 0.26                 | 0.50                 | 0.49                 |
| 1.5 | 0.3   | 0.5            | 0.12        | 0.07        | 0.08        | 0.12                 | 0.07                 | 0.06                 | 0.05        | 0.11        | 0.07        | 0.14                 | 0.24                 | 0.22                 |
| 1.5 | 0.3   | 0.8            | 0.06        | 0.03        | 0.04        | 0.06                 | 0.03                 | 0.03                 | 0.03        | 0.06        | 0.04        | 0.08                 | 0.12                 | 0.11                 |
| 1.5 | 0.8   | 0.1            | 0.42        | 0.26        | 0.30        | 0.29                 | 0.21                 | 0.19                 | 0.22        | 0.40        | 0.24        | 0.44                 | 0.60                 | 0.64                 |
| 1.5 | 0.8   | 0.2            | 0.40        | 0.24        | 0.28        | 0.23                 | 0.15                 | 0.13                 | 0.21        | 0.38        | 0.23        | 0.32                 | 0.42                 | 0.42                 |
| 1.5 | 0.8   | 0.5            | 0.32        | 0.18        | 0.22        | 0.17                 | 0.08                 | 0.08                 | 0.17        | 0.31        | 0.18        | 0.22                 | 0.24                 | 0.21                 |
| 1.5 | 0.8   | 0.8            | 0.21        | 0.11        | 0.13        | 0.13                 | 0.05                 | 0.05                 | 0.11        | 0.20        | 0.11        | 0.16                 | 0.17                 | 0.12                 |



Table S9: Bias defined as the difference between median  $\hat{e}_i$  and median effectiveness, random design, summarized over 80 replicates and 10 geographies

| $r$ | $E_s$ | $\bar{y}_r(0)$ | Bias $\hat{e}_2$ | Bias $\hat{e}_3$ | Bias $\hat{e}_4$ | Bias $\hat{e}_5$ | Bias $\hat{e}_6$ |
|-----|-------|----------------|------------------|------------------|------------------|------------------|------------------|
| 0.5 | 0.3   | 0.1            | 0.27             | 0.21             | 0.05             | 0.03             | 0.23             |
| 0.5 | 0.3   | 0.2            | 0.26             | 0.20             | 0.05             | 0.02             | 0.22             |
| 0.5 | 0.3   | 0.5            | 0.22             | 0.16             | 0.03             | 0.01             | 0.17             |
| 0.5 | 0.3   | 0.8            | 0.13             | 0.10             | 0.01             | 0.00             | 0.11             |
| 0.5 | 0.8   | 0.1            | 0.60             | 0.45             | 0.04             | 0.01             | 0.45             |
| 0.5 | 0.8   | 0.2            | 0.60             | 0.45             | 0.04             | 0.01             | 0.45             |
| 0.5 | 0.8   | 0.5            | 0.58             | 0.44             | 0.03             | 0.01             | 0.44             |
| 0.5 | 0.8   | 0.8            | 0.50             | 0.38             | 0.02             | 0.00             | 0.41             |
| 1.0 | 0.3   | 0.1            | 0.15             | 0.11             | 0.08             | 0.02             | 0.14             |
| 1.0 | 0.3   | 0.2            | 0.14             | 0.10             | 0.07             | 0.01             | 0.13             |
| 1.0 | 0.3   | 0.5            | 0.11             | 0.08             | 0.05             | 0.01             | 0.10             |
| 1.0 | 0.3   | 0.8            | 0.06             | 0.05             | 0.03             | 0.00             | 0.06             |
| 1.0 | 0.8   | 0.1            | 0.34             | 0.25             | 0.12             | 0.02             | 0.30             |
| 1.0 | 0.8   | 0.2            | 0.33             | 0.25             | 0.12             | 0.02             | 0.29             |
| 1.0 | 0.8   | 0.5            | 0.30             | 0.22             | 0.10             | 0.01             | 0.26             |
| 1.0 | 0.8   | 0.8            | 0.23             | 0.17             | 0.07             | 0.00             | 0.20             |
| 1.5 | 0.3   | 0.1            | 0.07             | 0.05             | 0.10             | 0.02             | 0.08             |
| 1.5 | 0.3   | 0.2            | 0.07             | 0.05             | 0.09             | 0.01             | 0.07             |
| 1.5 | 0.3   | 0.5            | 0.05             | 0.04             | 0.06             | 0.01             | 0.05             |
| 1.5 | 0.3   | 0.8            | 0.03             | 0.02             | 0.03             | 0.00             | 0.03             |
| 1.5 | 0.8   | 0.1            | 0.17             | 0.13             | 0.20             | 0.03             | 0.18             |
| 1.5 | 0.8   | 0.2            | 0.16             | 0.12             | 0.19             | 0.02             | 0.17             |
| 1.5 | 0.8   | 0.5            | 0.14             | 0.11             | 0.15             | 0.01             | 0.14             |
| 1.5 | 0.8   | 0.8            | 0.10             | 0.07             | 0.10             | 0.00             | 0.09             |

## Figures

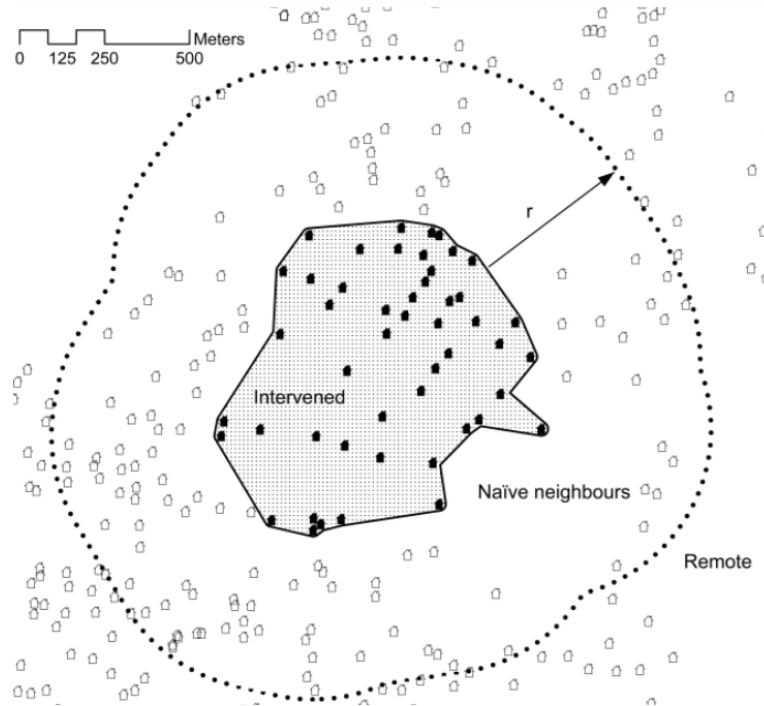

Figure S1: Household assignments during an intermediate time-step of the simulation for a small proportion of the surface illustrating how the intervened, neighbor and remote zones are assigned

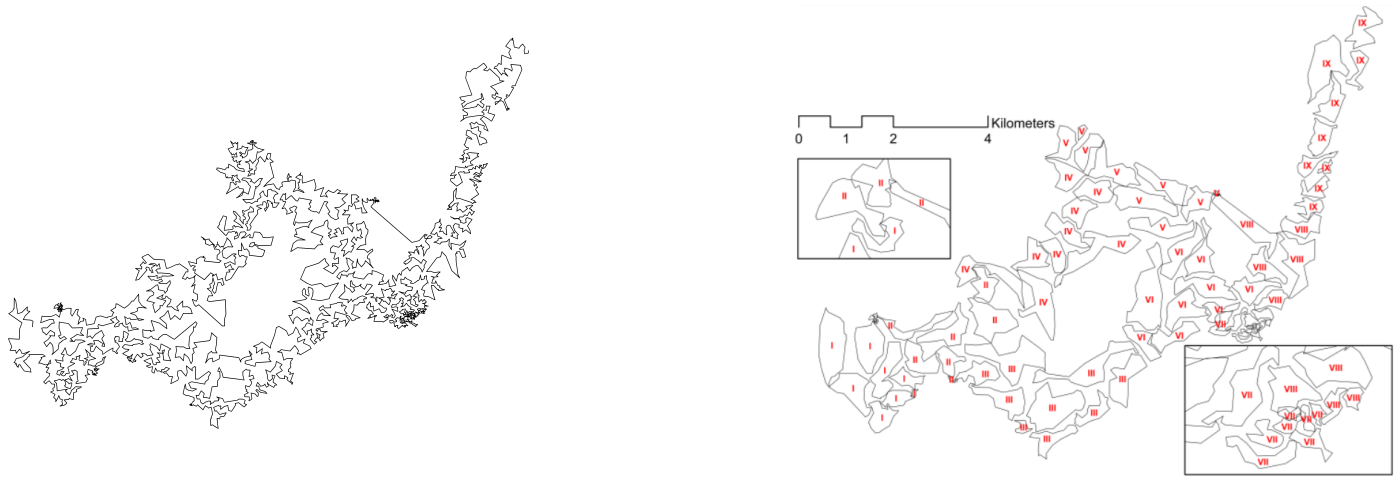

(a) Path connecting all households

(b) Cluster assignment

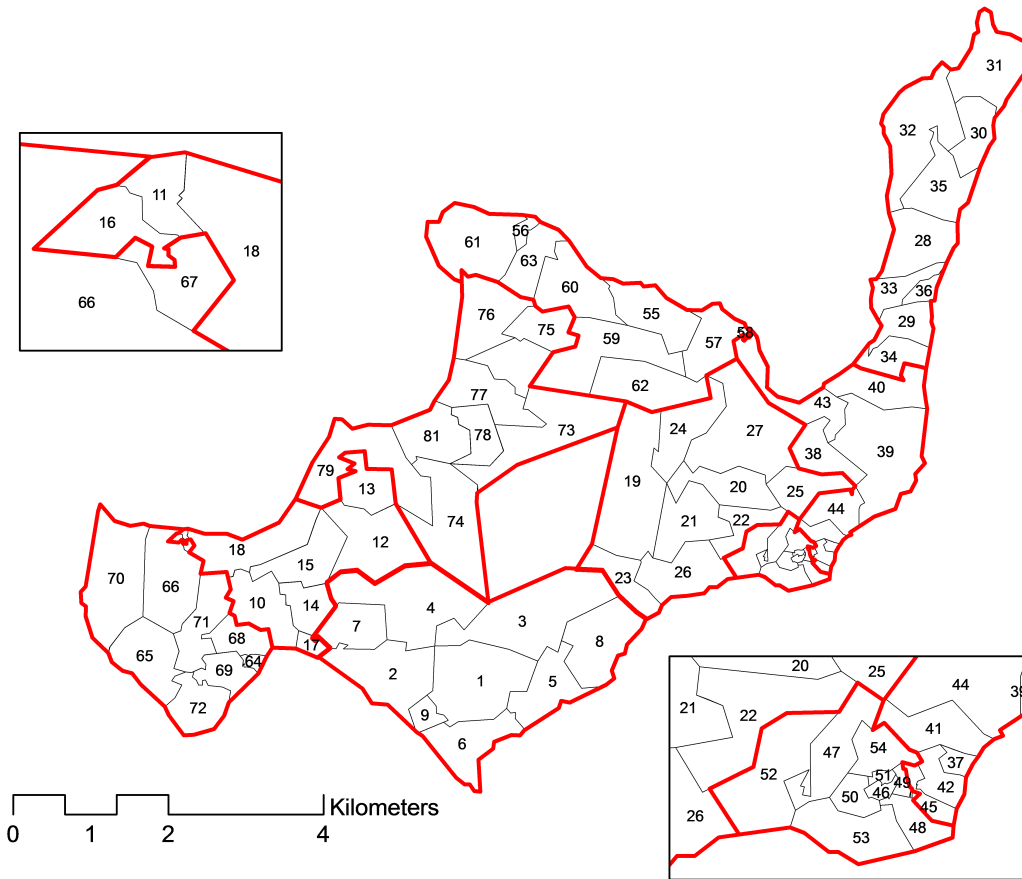

(c) Final hierarchical sequence

Figure S2: a: minimal spanning tree algorithm applied across the geographic locations of households of Rusinga Island to find an efficient (minimum distance) one-way path connecting all households. b: households were counted off in groups of 50 from a starting point on the south-west corner of the island along the one-way path to construct a total of 81 clusters. Each group of nine clusters is further combined into a metacluster, here denoted from I-IX. c: the final cluster rollout sequence for Rusinga Island is an hierarchical SWCRT. Clusters are identified in the order in which they received the intervention. The unshaded area at graph center is unpopulated.
